# Supplementary material for: Nutrient criteria to achieve New Zealand’s riverine macroinvertebrate targets
Source: PeerJ. 2021 May 31;9:e11556. doi: 10.7717/peerj.11556 (PMC8174153; doi:10.7717/peerj.11556)
Supplement: Supplemental Information 5 — While beyond the scope of this study, nutrient criteria derived using the minimisation-of-mismatch method for alternative macroinvertebrate target states (indicated by the MCI, QMCI and ASPM) across New Zealand rivers [file peerj-09-11556-s005.xlsx]

## Sheet: Sheet1
Dataset: 1=measured nutrients with reduced macroinvertebrate dataset, 2=modelled nutrients with full macroinvertebrate dataset	Metric	Score	Nutrient	Statistic	Concentration (ug/L)
1	ASPM	0.3	DIN	Min.	1007.8
1	ASPM	0.3	DIN	1st Qu.	1092.59
1	ASPM	0.3	DIN	Median	1124.38
1	ASPM	0.3	DIN	Mean	1126.18
1	ASPM	0.3	DIN	3rd Qu.	1156.18
1	ASPM	0.3	DIN	Max.	1293.95
1	ASPM	0.3	DRP	Min.	26.24
1	ASPM	0.3	DRP	1st Qu.	27.91
1	ASPM	0.3	DRP	Median	27.91
1	ASPM	0.3	DRP	Mean	28.2535
1	ASPM	0.3	DRP	3rd Qu.	28.75
1	ASPM	0.3	DRP	Max.	32.1
1	ASPM	0.35	DIN	Min.1	636.88
1	ASPM	0.35	DIN	1st Qu.1	708.41
1	ASPM	0.35	DIN	Median1	732.26
1	ASPM	0.35	DIN	Mean1	733.635
1	ASPM	0.35	DIN	3rd Qu.1	764.05
1	ASPM	0.35	DIN	Max.1	838.24
1	ASPM	0.35	DRP	Min.1	19.54
1	ASPM	0.35	DRP	1st Qu.1	20.38
1	ASPM	0.35	DRP	Median1	21.21
1	ASPM	0.35	DRP	Mean1	20.9881
1	ASPM	0.35	DRP	3rd Qu.1	21.21
1	ASPM	0.35	DRP	Max.1	23.73
1	ASPM	0.4	DIN	Min.2	329.54
1	ASPM	0.4	DIN	1st Qu.2	424.92
1	ASPM	0.4	DIN	Median2	446.11
1	ASPM	0.4	DIN	Mean2	448.128
1	ASPM	0.4	DIN	3rd Qu.2	477.91
1	ASPM	0.4	DIN	Max.2	573.29
1	ASPM	0.4	DRP	Min.2	13.68
1	ASPM	0.4	DRP	1st Qu.2	14.52
1	ASPM	0.4	DRP	Median2	15.36
1	ASPM	0.4	DRP	Mean2	15.5238
1	ASPM	0.4	DRP	3rd Qu.2	16.19
1	ASPM	0.4	DRP	Max.2	17.87
1	ASPM	0.45	DIN	Min.3	53.99
1	ASPM	0.45	DIN	1st Qu.3	138.77
1	ASPM	0.45	DIN	Median3	159.97
1	ASPM	0.45	DIN	Mean3	163.679
1	ASPM	0.45	DIN	3rd Qu.3	202.36
1	ASPM	0.45	DIN	Max.3	255.35
1	ASPM	0.45	DRP	Min.3	7.82
1	ASPM	0.45	DRP	1st Qu.3	9.5
1	ASPM	0.45	DRP	Median3	9.5
1	ASPM	0.45	DRP	Mean3	9.6977
1	ASPM	0.45	DRP	3rd Qu.3	10.33
1	ASPM	0.45	DRP	Max.3	11.17
1	ASPM	0.5	DRP	Min.4	0.29
1	ASPM	0.5	DRP	1st Qu.4	1.96
1	ASPM	0.5	DRP	Median4	1.96
1	ASPM	0.5	DRP	Mean4	2.1549
1	ASPM	0.5	DRP	3rd Qu.4	2.8
1	ASPM	0.5	DRP	Max.4	3.64
1	MCI	80	DIN	Min.	1463.52
1	MCI	80	DIN	1st Qu.	1633.08
1	MCI	80	DIN	Median	1686.07
1	MCI	80	DIN	Mean	1686.39
1	MCI	80	DIN	3rd Qu.	1739.06
1	MCI	80	DIN	Max.	1972.22
1	MCI	80	DRP	Min.	36.28
1	MCI	80	DRP	1st Qu.	38.79
1	MCI	80	DRP	Median	39.63
1	MCI	80	DRP	Mean	39.6874
1	MCI	80	DRP	3rd Qu.	40.47
1	MCI	80	DRP	Max.	42.98
1	MCI	90	DIN	Min.1	933.62
1	MCI	90	DIN	1st Qu.1	1039.6
1	MCI	90	DIN	Median1	1071.39
1	MCI	90	DIN	Mean1	1071.22
1	MCI	90	DIN	3rd Qu.1	1103.19
1	MCI	90	DIN	Max.1	1209.17
1	MCI	90	DRP	Min.1	25.4
1	MCI	90	DRP	1st Qu.1	27.07
1	MCI	90	DRP	Median1	27.91
1	MCI	90	DRP	Mean1	27.6689
1	MCI	90	DRP	3rd Qu.1	27.91
1	MCI	90	DRP	Max.1	30.42
1	MCI	100	DIN	Min.2	287.14
1	MCI	100	DIN	1st Qu.2	382.53
1	MCI	100	DIN	Median2	403.72
1	MCI	100	DIN	Mean2	407.241
1	MCI	100	DIN	3rd Qu.2	435.52
1	MCI	100	DIN	Max.2	541.5
1	MCI	100	DRP	Min.2	12.84
1	MCI	100	DRP	1st Qu.2	14.52
1	MCI	100	DRP	Median2	14.52
1	MCI	100	DRP	Mean2	14.84
1	MCI	100	DRP	3rd Qu.2	15.36
1	MCI	100	DRP	Max.2	17.03
1	MCI	110	DRP	Min.3	2.8
1	MCI	110	DRP	1st Qu.3	4.47
1	MCI	110	DRP	Median3	4.47
1	MCI	110	DRP	Mean3	4.85226
1	MCI	110	DRP	3rd Qu.3	5.31
1	MCI	110	DRP	Max.3	6.99
1	QMCI	4	DIN	Min.	986.61
1	QMCI	4	DIN	1st Qu.	1071.39
1	QMCI	4	DIN	Median	1124.38
1	QMCI	4	DIN	Mean	1115.37
1	QMCI	4	DIN	3rd Qu.	1156.18
1	QMCI	4	DIN	Max.	1272.75
1	QMCI	4	DRP	Min.	24.56
1	QMCI	4	DRP	1st Qu.	26.8625
1	QMCI	4	DRP	Median	27.91
1	QMCI	4	DRP	Mean	27.6089
1	QMCI	4	DRP	3rd Qu.	27.91
1	QMCI	4	DRP	Max.	30.42
1	QMCI	4.5	DIN	Min.1	456.71
1	QMCI	4.5	DIN	1st Qu.1	573.29
1	QMCI	4.5	DIN	Median1	626.28
1	QMCI	4.5	DIN	Mean1	624.583
1	QMCI	4.5	DIN	3rd Qu.1	668.67
1	QMCI	4.5	DIN	Max.1	774.65
1	QMCI	4.5	DRP	Min.1	14.52
1	QMCI	4.5	DRP	1st Qu.1	17.03
1	QMCI	4.5	DRP	Median1	17.87
1	QMCI	4.5	DRP	Mean1	17.6492
1	QMCI	4.5	DRP	3rd Qu.1	18.7
1	QMCI	4.5	DRP	Max.1	19.54
1	QMCI	5	DIN	Min.2	75.19
1	QMCI	5	DIN	1st Qu.2	178.52
1	QMCI	5	DIN	Median2	212.96
1	QMCI	5	DIN	Mean2	214.867
1	QMCI	5	DIN	3rd Qu.2	255.35
1	QMCI	5	DIN	Max.2	329.54
1	QMCI	5	DRP	Min.2	7.82
1	QMCI	5	DRP	1st Qu.2	8.66
1	QMCI	5	DRP	Median2	9.5
1	QMCI	5	DRP	Mean2	9.5054
1	QMCI	5	DRP	3rd Qu.2	10.33
1	QMCI	5	DRP	Max.2	12.01
1	QMCI	5.5	DRP	Min.3	2.8
1	QMCI	5.5	DRP	1st Qu.3	3.64
1	QMCI	5.5	DRP	Median3	4.47
1	QMCI	5.5	DRP	Mean3	4.1136
1	QMCI	5.5	DRP	3rd Qu.3	4.47
1	QMCI	5.5	DRP	Max.3	5.31
2	ASPM	0.3	DIN	Min.	588.56
2	ASPM	0.3	DIN	1st Qu.	623.688
2	ASPM	0.3	DIN	Median	630.19
2	ASPM	0.3	DIN	Mean	629.253
2	ASPM	0.3	DIN	3rd Qu.	635.39
2	ASPM	0.3	DIN	Max.	651.01
2	ASPM	0.3	DRP	Min.	19.83
2	ASPM	0.3	DRP	1st Qu.	20.47
2	ASPM	0.3	DRP	Median	20.56
2	ASPM	0.3	DRP	Mean	20.5203
2	ASPM	0.3	DRP	3rd Qu.	20.56
2	ASPM	0.3	DRP	Max.	20.92
2	ASPM	0.35	DIN	Min.1	458.45
2	ASPM	0.35	DIN	1st Qu.1	489.68
2	ASPM	0.35	DIN	Median1	494.88
2	ASPM	0.35	DIN	Mean1	495.036
2	ASPM	0.35	DIN	3rd Qu.1	500.08
2	ASPM	0.35	DIN	Max.1	510.49
2	ASPM	0.35	DRP	Min.1	16.95
2	ASPM	0.35	DRP	1st Qu.1	17.31
2	ASPM	0.35	DRP	Median1	17.67
2	ASPM	0.35	DRP	Mean1	17.5296
2	ASPM	0.35	DRP	3rd Qu.1	17.67
2	ASPM	0.35	DRP	Max.1	18.39
2	ASPM	0.4	DIN	Min.2	338.75
2	ASPM	0.4	DIN	1st Qu.2	359.57
2	ASPM	0.4	DIN	Median2	364.77
2	ASPM	0.4	DIN	Mean2	364.046
2	ASPM	0.4	DIN	3rd Qu.2	369.98
2	ASPM	0.4	DIN	Max.2	390.8
2	ASPM	0.4	DRP	Min.2	14.06
2	ASPM	0.4	DRP	1st Qu.2	14.42
2	ASPM	0.4	DRP	Median2	14.78
2	ASPM	0.4	DRP	Mean2	14.7311
2	ASPM	0.4	DRP	3rd Qu.2	14.78
2	ASPM	0.4	DRP	Max.2	15.15
2	ASPM	0.45	DIN	Min.3	224.26
2	ASPM	0.45	DIN	1st Qu.3	239.87
2	ASPM	0.45	DIN	Median3	245.08
2	ASPM	0.45	DIN	Mean3	245.858
2	ASPM	0.45	DIN	3rd Qu.3	250.28
2	ASPM	0.45	DIN	Max.3	271.1
2	ASPM	0.45	DRP	Min.3	11.54
2	ASPM	0.45	DRP	1st Qu.3	11.9
2	ASPM	0.45	DRP	Median3	12.08
2	ASPM	0.45	DRP	Mean3	12.0908
2	ASPM	0.45	DRP	3rd Qu.3	12.26
2	ASPM	0.45	DRP	Max.3	12.62
2	ASPM	0.5	DIN	Min.4	88.95
2	ASPM	0.5	DIN	1st Qu.4	99.36
2	ASPM	0.5	DIN	Median4	104.56
2	ASPM	0.5	DIN	Mean4	106.072
2	ASPM	0.5	DIN	3rd Qu.4	109.77
2	ASPM	0.5	DIN	Max.4	120.18
2	MCI	80	DIN	Min.	817.54
2	MCI	80	DIN	1st Qu.	859.18
2	MCI	80	DIN	Median	864.38
2	MCI	80	DIN	Mean	864.848
2	MCI	80	DIN	3rd Qu.	874.79
2	MCI	80	DIN	Max.	900.81
2	MCI	80	DRP	Min.	24.89
2	MCI	80	DRP	1st Qu.	25.61
2	MCI	80	DRP	Median	25.97
2	MCI	80	DRP	Mean	25.9736
2	MCI	80	DRP	3rd Qu.	26.33
2	MCI	80	DRP	Max.	26.69
2	MCI	90	DIN	Min.1	598.96
2	MCI	90	DIN	1st Qu.1	630.19
2	MCI	90	DIN	Median1	635.39
2	MCI	90	DIN	Mean1	637.163
2	MCI	90	DIN	3rd Qu.1	645.8
2	MCI	90	DIN	Max.1	682.23
2	MCI	90	DRP	Min.1	20.2
2	MCI	90	DRP	1st Qu.1	20.56
2	MCI	90	DRP	Median1	20.56
2	MCI	90	DRP	Mean1	20.7328
2	MCI	90	DRP	3rd Qu.1	20.92
2	MCI	90	DRP	Max.1	21.28
2	MCI	100	DIN	Min.2	375.18
2	MCI	100	DIN	1st Qu.2	396
2	MCI	100	DIN	Median2	401.2
2	MCI	100	DIN	Mean2	402.973
2	MCI	100	DIN	3rd Qu.2	407.71
2	MCI	100	DIN	Max.2	422.02
2	MCI	100	DRP	Min.2	15.15
2	MCI	100	DRP	1st Qu.2	15.15
2	MCI	100	DRP	Median2	15.51
2	MCI	100	DRP	Mean2	15.4884
2	MCI	100	DRP	3rd Qu.2	15.51
2	MCI	100	DRP	Max.2	15.87
2	MCI	110	DIN	Min.3	140.99
2	MCI	110	DIN	1st Qu.3	156.61
2	MCI	110	DIN	Median3	161.81
2	MCI	110	DIN	Mean3	162.07
2	MCI	110	DIN	3rd Qu.3	167.01
2	MCI	110	DIN	Max.3	182.63
2	MCI	110	DRP	Min.3	9.73
2	MCI	110	DRP	1st Qu.3	10.09
2	MCI	110	DRP	Median3	10.09
2	MCI	110	DRP	Mean3	10.2312
2	MCI	110	DRP	3rd Qu.3	10.46
2	MCI	110	DRP	Max.3	10.82
2	MCI	120	DRP	Min.4	6.13
2	MCI	120	DRP	1st Qu.4	6.49
2	MCI	120	DRP	Median4	6.49
2	MCI	120	DRP	Mean4	6.4612
2	MCI	120	DRP	3rd Qu.4	6.49
2	MCI	120	DRP	Max.4	6.85
2	MCI	130	DRP	Min.5	3.6
2	MCI	130	DRP	1st Qu.5	3.96
2	MCI	130	DRP	Median5	3.96
2	MCI	130	DRP	Mean5	3.9312
2	MCI	130	DRP	3rd Qu.5	3.96
2	MCI	130	DRP	Max.5	4.32
2	QMCI	4	DIN	Min.	781.11
2	QMCI	4	DIN	1st Qu.	796.72
2	QMCI	4	DIN	Median	807.13
2	QMCI	4	DIN	Mean	807.445
2	QMCI	4	DIN	3rd Qu.	817.54
2	QMCI	4	DIN	Max.	843.56
2	QMCI	4	DRP	Min.	23.8
2	QMCI	4	DRP	1st Qu.	24.52
2	QMCI	4	DRP	Median	24.89
2	QMCI	4	DRP	Mean	24.782
2	QMCI	4	DRP	3rd Qu.	24.89
2	QMCI	4	DRP	Max.	25.61
2	QMCI	4.5	DIN	Min.1	572.94
2	QMCI	4.5	DIN	1st Qu.1	588.56
2	QMCI	4.5	DIN	Median1	593.76
2	QMCI	4.5	DIN	Mean1	596.726
2	QMCI	4.5	DIN	3rd Qu.1	604.17
2	QMCI	4.5	DIN	Max.1	630.19
2	QMCI	4.5	DRP	Min.1	19.47
2	QMCI	4.5	DRP	1st Qu.1	19.83
2	QMCI	4.5	DRP	Median1	19.83
2	QMCI	4.5	DRP	Mean1	19.9377
2	QMCI	4.5	DRP	3rd Qu.1	20.2
2	QMCI	4.5	DRP	Max.1	20.56
2	QMCI	5	DIN	Min.2	437.63
2	QMCI	5	DIN	1st Qu.2	468.86
2	QMCI	5	DIN	Median2	479.27
2	QMCI	5	DIN	Mean2	477.862
2	QMCI	5	DIN	3rd Qu.2	489.68
2	QMCI	5	DIN	Max.2	500.08
2	QMCI	5	DRP	Min.2	16.59
2	QMCI	5	DRP	1st Qu.2	16.95
2	QMCI	5	DRP	Median2	17.31
2	QMCI	5	DRP	Mean2	17.1552
2	QMCI	5	DRP	3rd Qu.2	17.31
2	QMCI	5	DRP	Max.2	17.67
2	QMCI	5.5	DIN	Min.3	297.12
2	QMCI	5.5	DIN	1st Qu.3	317.94
2	QMCI	5.5	DIN	Median3	328.34
2	QMCI	5.5	DIN	Mean3	326.158
2	QMCI	5.5	DIN	3rd Qu.3	333.55
2	QMCI	5.5	DIN	Max.3	349.16
2	QMCI	5.5	DRP	Min.3	13.34
2	QMCI	5.5	DRP	1st Qu.3	13.7
2	QMCI	5.5	DRP	Median3	13.7
2	QMCI	5.5	DRP	Mean3	13.8188
2	QMCI	5.5	DRP	3rd Qu.3	14.06
2	QMCI	5.5	DRP	Max.3	14.42
2	QMCI	6	DIN	Min.4	161.81
2	QMCI	6	DIN	1st Qu.4	172.22
2	QMCI	6	DIN	Median4	177.42
2	QMCI	6	DIN	Mean4	179.66
2	QMCI	6	DIN	3rd Qu.4	183.93
2	QMCI	6	DIN	Max.4	203.44
2	QMCI	6	DRP	Min.4	10.09
2	QMCI	6	DRP	1st Qu.4	10.46
2	QMCI	6	DRP	Median4	10.46
2	QMCI	6	DRP	Mean4	10.4513
2	QMCI	6	DRP	3rd Qu.4	10.46
2	QMCI	6	DRP	Max.4	10.82
2	QMCI	6.5	DIN	Min.5	26.5
2	QMCI	6.5	DIN	1st Qu.5	47.32
2	QMCI	6.5	DIN	Median5	52.52
2	QMCI	6.5	DIN	Mean5	53.8206
2	QMCI	6.5	DIN	3rd Qu.5	57.72
2	QMCI	6.5	DIN	Max.5	73.34
2	QMCI	6.5	DRP	Min.5	7.21
2	QMCI	6.5	DRP	1st Qu.5	7.57
2	QMCI	6.5	DRP	Median5	7.57
2	QMCI	6.5	DRP	Mean5	7.6816
2	QMCI	6.5	DRP	3rd Qu.5	7.93
2	QMCI	6.5	DRP	Max.5	8.29
2	QMCI	7	DRP	Min.6	4.68
2	QMCI	7	DRP	1st Qu.6	4.68
2	QMCI	7	DRP	Median6	5.04
2	QMCI	7	DRP	Mean6	4.9392
2	QMCI	7	DRP	3rd Qu.6	5.04
2	QMCI	7	DRP	Max.6	5.4
